# Supplementary material
Source: PubMed Central journal article supplement (PMC8040049)
Supplement: ml0c00684_si_001.pdf [file ml0c00684_si_001.pdf]

# Structural insights into plasticity and discovery of remdesivir metabolite GS-441524 binding in SARS-CoV-2 macrodomain

Xiaomin Ni<sup>1,2#</sup>, Martin Schröder<sup>1,2#</sup>, Vincent Olieric<sup>3</sup>, May E. Sharpe<sup>3</sup>, Victor Hernandez-Olmos<sup>4</sup>, Ewgenij Proschak<sup>2,4</sup>, Daniel Merk<sup>2</sup>, Stefan Knapp<sup>1,2\*</sup>, Apirat Chaikuad<sup>1,2\*</sup>

<sup>1</sup> Structural Genomics Consortium, Buchmann Institute for Molecular Life Sciences, 60438 Frankfurt am Main, Germany

<sup>2</sup> Institute of Pharmaceutical Chemistry, Goethe University Frankfurt, 60438 Frankfurt am Main, Germany

<sup>3</sup> Swiss Light Source, Paul Scherrer Institute, 5232 Villigen, Switzerland.

<sup>4</sup> Fraunhofer Institute for Translational Medicine and Pharmacology ITMP, Theodor-Stern-Kai 7, 60596 Frankfurt, Germany

# These authors contributed equally.

\* Correspondence: Stefan Knapp: [knapp@pharmchem.uni-frankfurt.de](mailto:knapp@pharmchem.uni-frankfurt.de); Apirat Chaikuad: [chaikuad@pharmchem.uni-frankfurt.de](mailto:chaikuad@pharmchem.uni-frankfurt.de)

## Supplementary information

|                                                                                                                            | Page |
|----------------------------------------------------------------------------------------------------------------------------|------|
| <b>Supplementary figure s1.</b> $ F_o  -  F_c $ omitted electron density map contoured at $3\sigma$ for the bound ligands. | S2   |
| <b>Supplementary table s1.</b> Details of recombinant SARS-CoV-2 macrodomain.                                              | S3   |
| <b>Supplementary Table s2.</b> Data collection and refinement statistics.                                                  | S4   |
| <b>Supplementary method.</b> Synthesis of GS-441524 monophosphate                                                          | S6   |

HEPES

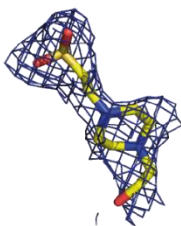

MES

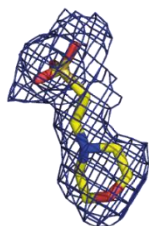

ADP-ribose

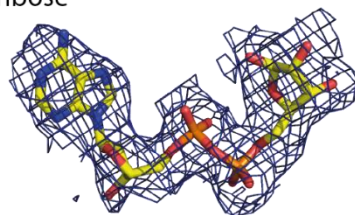

adenosine  
conformation 1

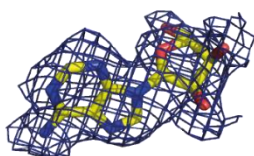

adenosine  
conformation 2

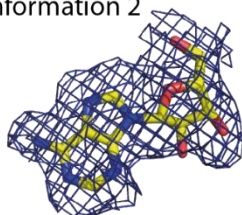

GMP

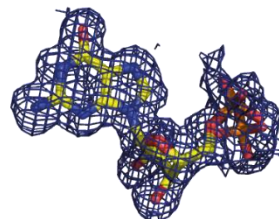

ADP-ribose-2-phosphate  
(ADPRP)

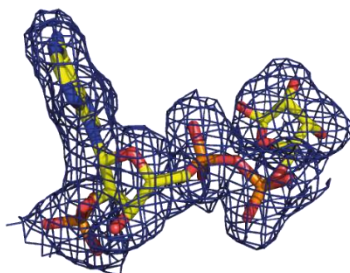

GS-441524

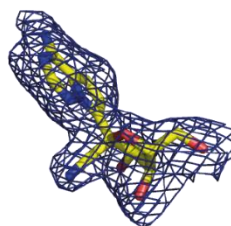

**Supplementary Figure s1.**  $|F_o| - |F_c|$  omitted electron density map contoured at  $3\sigma$  for the bound ligands.

**Supplementary table s1.** Details of recombinant SARS-CoV-2 macrodomain.

|                                  | <b>Vector</b>     | <b>Recombinant protein sequence</b>                                                                                                                                                                                  |
|----------------------------------|-------------------|----------------------------------------------------------------------------------------------------------------------------------------------------------------------------------------------------------------------|
| <b>SAR-CoV-2<br/>macrodomain</b> | <b>pET-28a(+)</b> | <b>MGSSHHHHHSSGENLYFQGHMVNSFSGYLKLTDNVYIKNADIVEEAK<br/>KVKPTVVVNAANVYLKHGGGVAGALNKATNNAMQVESDDYIATNGP<br/>LKVGGSCVLSGHNLAHCLHVVGPNVKNKGEDIQLLSAYENFNQHEVLL<br/>APLLSAGIFGADPIHSLRVCVDTVRTNVYLAVFDKNLYDKLVSSFLEMK</b> |

**Supplementary Table s2.** Data collection and refinement statistics.

| <b>Complex</b>                                  | <b>apo/HEPES</b>                                                                     | <b>apo/MES</b>                                                                | <b>ADP-ribose</b>                                                                 |
|-------------------------------------------------|--------------------------------------------------------------------------------------|-------------------------------------------------------------------------------|-----------------------------------------------------------------------------------|
| PDB codes                                       | <b>6ywk</b>                                                                          | <b>6ywm</b>                                                                   | <b>6ywl</b>                                                                       |
| Beamline                                        | SLS X06SA                                                                            | SLS X06SA                                                                     | SLS X06SA                                                                         |
| <i>Data Collection</i>                          |                                                                                      |                                                                               |                                                                                   |
| Resolution <sup>a</sup> (Å)                     | 49.09-2.20 (2.28-2.20)                                                               | 49.22-2.16 (2.24-2.16)                                                        | 48.83-2.50 (2.64-2.50)                                                            |
| Space group                                     | <i>P</i> 2 <sub>1</sub> 2 <sub>1</sub> 2 <sub>1</sub>                                | <i>P</i> 2 <sub>1</sub> 2 <sub>1</sub> 2 <sub>1</sub>                         | <i>P</i> 2 <sub>1</sub> 2 <sub>1</sub> 2 <sub>1</sub>                             |
| Cell dimensions                                 | a=39.2, b=111.8, c=196.4 Å<br>α=β=γ=90.0                                             | a=37.8, b=109.1, c=114.4 Å<br>α=β=γ=90.0                                      | a=38.4, b=111.9, c=195.3 Å<br>α=β=γ=90.0°                                         |
| Number of unique reflections <sup>a</sup>       | 45,087 (4,348)                                                                       | 26,281 (2,558)                                                                | 30,002 (4,288)                                                                    |
| Completeness <sup>a</sup> (%)                   | 100.0 (99.9)                                                                         | 100.0 (100.0)                                                                 | 99.4 (99.3)                                                                       |
| I/σI <sup>a</sup>                               | 10.7 (2.0)                                                                           | 8.3 (2.0)                                                                     | 6.9 (1.9)                                                                         |
| R <sub>merge</sub> <sup>a</sup> (%)             | 0.138 (0.925)                                                                        | 0.162 (0.873)                                                                 | 0.199 (0.930)                                                                     |
| CC (1/2) <sup>a</sup>                           | 0.998 (0.762)                                                                        | 0.995 (0.787)                                                                 | 0.990 (0.736)                                                                     |
| Redundancy <sup>a</sup>                         | 8.5 (7.9)                                                                            | 6.7 (6.9)                                                                     | 5.6 (5.9)                                                                         |
| <i>Refinement</i>                               |                                                                                      |                                                                               |                                                                                   |
| Number atoms in refinement (P/L/O) <sup>b</sup> | 6,496/ 15/ 424                                                                       | 3,885/ 24/ 287                                                                | 6,472/ 180/ 248                                                                   |
| B factor (P/L/O) <sup>b</sup> (Å <sup>2</sup> ) | 39/ 76/ 48                                                                           | 34/ 57/ 39                                                                    | 40/ 31/ 38                                                                        |
| R <sub>fact</sub> (%)                           | 17.6                                                                                 | 17.5                                                                          | 18.9                                                                              |
| R <sub>free</sub> (%)                           | 21.4                                                                                 | 22.9                                                                          | 22.3                                                                              |
| rmsd bond <sup>c</sup> (Å)                      | 0.013                                                                                | 0.013                                                                         | 0.010                                                                             |
| rmsd angle <sup>c</sup> (°)                     | 1.4                                                                                  | 1.3                                                                           | 1.1                                                                               |
| <i>Molprobit Ramachandran</i>                   |                                                                                      |                                                                               |                                                                                   |
| Favor (%)                                       | 99.65                                                                                | 99.01                                                                         | 98.11                                                                             |
| Outlier (%)                                     | 0                                                                                    | 0                                                                             | 0                                                                                 |
| Crystallization condition                       | 33% broad-molecular-weight PEG smears, 0.1 M MgCl <sub>2</sub> , 0.1 M HEPES, pH 7.0 | 23% PEG 6000, 0.1 M MgCl <sub>2</sub> , 5% ethylene glycol, 0.1 M MES, pH 6.0 | 27% PEG 4000, 0.2 M sodium acetate, 0.05 M MgCl <sub>2</sub> , 0.1 M tris, pH 8.0 |

<sup>a</sup> Value in brackets indicates high-resolution shell statistics.

<sup>b</sup> P/L/O indicates protein, ligands and others.

<sup>c</sup> rmsd indicates root-mean-square deviation.

**Supplementary Table s2. (continued)** Data collection and refinement statistics.

| Complex                                            | Adenosine                                                                           | GMP                                                                            | ADPRP                                                                               | GS-441524                                              |
|----------------------------------------------------|-------------------------------------------------------------------------------------|--------------------------------------------------------------------------------|-------------------------------------------------------------------------------------|--------------------------------------------------------|
| PDB codes                                          | 7bf3                                                                                | 7bf4                                                                           | 7bf5                                                                                | 7bf6                                                   |
| Beamline                                           | SLS X06SA                                                                           | SLS X06DA                                                                      | SLS X06SA                                                                           | SLS X06SA                                              |
| <i>Data Collection</i>                             |                                                                                     |                                                                                |                                                                                     |                                                        |
| Resolution <sup>a</sup> (Å)                        | 48.99-2.00<br>(2.07-2.00)                                                           | 36.26-1.55<br>(1.60-1.55)                                                      | 48.80-2.05<br>(2.12-2.05)                                                           | 48.43-2.15<br>(2.23-2.15)                              |
| Space group                                        | <i>P</i> 2 <sub>1</sub> 2 <sub>1</sub> 2 <sub>1</sub>                               | <i>P</i> 4 <sub>1</sub>                                                        | <i>P</i> 2 <sub>1</sub> 2 <sub>1</sub> 2 <sub>1</sub>                               | <i>C</i> 2                                             |
| Cell dimensions                                    | a=39.2, b=111.4,<br>c=196.0 Å<br>α=β=γ=90.0                                         | a=b=72.5, c=33.4 Å<br>α=β=γ=90.0                                               | a=38.6, b=111.3,<br>c=195.2 Å<br>α=β=γ=90.0°                                        | a=157.2, b=30.5,<br>c=111.7 Å<br>α=γ=90.0°, β=119.9°   |
| Number of unique reflections <sup>a</sup>          | 59,412 (5,774)                                                                      | 25,315 (2,287)                                                                 | 53,878 (5,196)                                                                      | 25,440 (2,459)                                         |
| Completeness <sup>a</sup> (%)                      | 100.0 (100.0)                                                                       | 99.2 (92.8)                                                                    | 99.7 (99.8)                                                                         | 99.1 (99.2)                                            |
| I/σI <sup>a</sup>                                  | 10.9 (2.0)                                                                          | 13.8 (2.6)                                                                     | 8.3 (1.9)                                                                           | 10.7 (1.9)                                             |
| R <sub>merge</sub> <sup>a</sup> (%)                | 0.127 (0.885)                                                                       | 0.064 (0.349)                                                                  | 0.141 (0.839)                                                                       | 0.090 (0.755)                                          |
| CC (1/2) <sup>a</sup>                              | 0.998 (0.735)                                                                       | 0.998 (0.807)                                                                  | 0.995 (0.695)                                                                       | 0.998 (0.677)                                          |
| Redundancy <sup>a</sup>                            | 7.5 (7.5)                                                                           | 6.1 (3.3)                                                                      | 6.2 (6.3)                                                                           | 5.3 (5.2)                                              |
| <i>Refinement</i>                                  |                                                                                     |                                                                                |                                                                                     |                                                        |
| Number atoms in refinement (P/L/O) <sup>b</sup>    | 6,538/ 38/ 628                                                                      | 1,329/ 48/ 241                                                                 | 6,500/ 160/ 569                                                                     | 3,838/ 63/ 168                                         |
| B factor (P/L/O) <sup>b</sup><br>(Å <sup>2</sup> ) | 29/ 60/ 37                                                                          | 14/ 13/ 30                                                                     | 28/ 41/ 35                                                                          | 49/ 39/ 43                                             |
| R <sub>fact</sub> (%)                              | 17.5                                                                                | 13.8                                                                           | 17.7                                                                                | 18.0                                                   |
| R <sub>free</sub> (%)                              | 21.7                                                                                | 17.4                                                                           | 21.7                                                                                | 22.6                                                   |
| rmsd bond <sup>c</sup> (Å)                         | 0.013                                                                               | 0.018                                                                          | 0.014                                                                               | 0.012                                                  |
| rmsd angle <sup>c</sup> (°)                        | 1.4                                                                                 | 1.7                                                                            | 1.4                                                                                 | 1.4                                                    |
| <i>Molprobrity</i>                                 |                                                                                     |                                                                                |                                                                                     |                                                        |
| <i>Ramachandran</i>                                |                                                                                     |                                                                                |                                                                                     |                                                        |
| Favor (%)                                          | 98.94                                                                               | 99.40                                                                          | 97.64                                                                               | 99.00                                                  |
| Outlier (%)                                        | 0                                                                                   | 0                                                                              | 0                                                                                   | 0                                                      |
| Crystallization condition                          | 33% broad-molecular-weight PEG smears, 0.1 M MgCl <sub>2</sub> , 0.1 M tris, pH 7.0 | 30% PEG 4000, 0.2 M sodium acetate, 0.1 MgCl <sub>2</sub> , 0.1 M tris, pH 8.3 | 30% broad-molecular-weight PEG smears, 0.1 M MgCl <sub>2</sub> , 0.1 M tris, pH 7.0 | 30% PEG 4000, 0.2 M sodium acetate, 0.1 M tris, pH 8.3 |

<sup>a</sup> Value in brackets indicates high-resolution shell statistics.<sup>b</sup> P/L/O indicates protein, ligands and others.<sup>c</sup> rmsd indicates root-mean-square deviation.

### Supplementary method. Synthesis of GS-441524 monophosphate

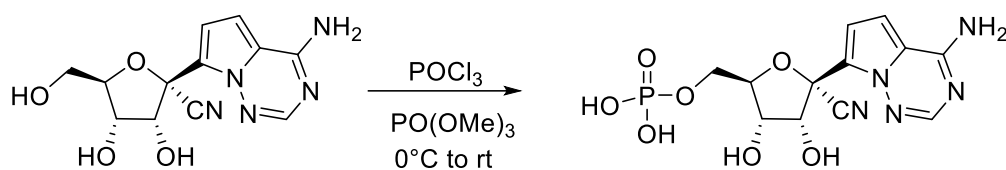

### GS-441524 monophosphate

A solution of GS-441524 (43.7 mg, 0.15 mmol) in trimethyl phosphate (1.5 mL) was stirred in a sealed tube under Ar at rt for 15 min. The solution was then cooled to 0°C and freshly distilled phosphorous oxychloride (21.2  $\mu$ L, 0.225 mmol) was added dropwise. The resulting solution was stirred at rt for 1h. Further 100  $\mu$ L of phosphorous oxychloride were added at rt and the resulting solution was stirred at rt for 1h (full conversion by HPLC). The reaction mixture was quenched with water at 0°C and directly purified by preparative HPLC to obtain 43.6 mg (78%) of the expected product as a white solid. <sup>1</sup>H NMR (300 MHz, D<sub>2</sub>O)  $\delta$  7.98 (s, 1H), 7.27 (d, *J* = 4.9 Hz, 1H), 7.05 (d, *J* = 4.9 Hz, 1H), 4.83 (d, *J* = 5.2 Hz, 1H), 4.43-4.39 (m, 1H), 4.31 (t, *J* = 4.7 Hz, 1H), 4.04-3.92 (m, 2H); R<sub>f</sub> HPLC: 3.4 Min (13 Min from 10 to 95% MeCN in water (0.1 % formic acid), then 7 min 95% MeCN). 95.7 % purity; HRMS (MALDI): *m/z* found. 372.0705 [M+H]<sup>+</sup> (cal. C<sub>12</sub>H<sub>15</sub>N<sub>5</sub>O<sub>7</sub>P 372.0704).

To record NMR-spectra, the compound was dissolved in D<sub>2</sub>O and measured on Avance 300 from Bruker Corporation (Massachusetts, USA). All chemical shift values are reported in ppm, the multiplicity of the signals assigned as follows: s (singlet), d (duplet), t (triplet) and m (multiplet). Mass spectrometry analysis was performed in positive ion mode by electrospray-ionization (ESI) on a LCMS-2020 single quadrupole MS from Shimadzu (Duisburg, Deutschland). Precision mass was measured using MALDI Orbitrap XL from Life Technologies GmbH (Darmstadt, Germany). For purity estimation of the synthesized compounds, a reverse phase high-performance liquid chromatography (RP-HPLC) was performed using the Luna 10  $\mu$ m C18(2) 100 Å, LC Column 250 x 4.6 mm from Phenomenex LTD (Aschaffenburg, Germany) and the analysis was conducted using the Shimadzu prominence module from Shimadzu. Acetonitrile and aqueous formic acid 0.1% were used as eluents. The established method for purity determination was initiated with 90% water (0.1% formic acid), then a linear gradient from 90% to 5% water (0.1% formic acid) for 13 min was chosen, finally additional 7 min 5% water (0.1% formic acid). The flow rate was adjusted to 1.0 mL/min and the UV-vis detection occurred at 254 nm and 280 nm, respectively.
